# Supplementary material for: Validation of Revised Chinese Version of PD-CRS in Parkinson's Disease Patients
Source: Parkinsons Dis. 2020 Feb 19;2020:5289136. doi: 10.1155/2020/5289136 (PMC7049872; doi:10.1155/2020/5289136)
Supplement: Supplementary Materials — Supplementary Table 1: acceptability of PD-CRS in NC; Supplementary Table 2: acceptability of PD-CRS in PD-MCI; Supplementary Table 3: acceptability of PD-CRS in PDD; Supplementary Table 4: cognitive function comparison between BDI <20 and ≥ 20 in PD-MCI; Supplementary Table 5: cognitive function comparison between BDI <20 and ≥ 20 in PDD. [file 5289136.f1.zip]

Archive with 2 entries (2 files):
- mat.5289136.v2.docx
- PD-CRS scale.doc
